# Supplementary material for: Plasma Biomarkers for Monitoring Brain Pathophysiology in FMR1 Premutation Carriers
Source: Front Mol Neurosci. 2016 Aug 12;9:71. doi: 10.3389/fnmol.2016.00071 (PMC4981605; doi:10.3389/fnmol.2016.00071)
Supplement: TABLE S1 — Complete list of metabolites identified by mass spectrometry. Metabolite identification was performed through the use of several databases including PubChem Compound, KEGG and HMDB, and the online chemical translation service, as described in the Methods. [file Table_1.XLSX]

## Sheet: identified_metabolites
Query	HMDB	PubChem	ChEBI	KEGG	METLIN
1-methylgalactose	NA	2108	NA	NA	NA
1-monoolein	NA	5283468	NA	NA	NA
1-monopalmitin	HMDB31074	14900	718061	NA	NA
1-monostearin	HMDB31075	24699	526874	NA	NA
1,2-Cyclohexanedione	HMDB31344	NA	41674	C06105	NA
1,5-Anhydrosorbitol	HMDB02712	64960	16070	C07326	3775
2-deoxyisotetronic acid	NA	NA	NA	NA	NA
2-deoxytetronic acid	HMDB00337	150929	NA	NA	NA
2-Hydroxybutyric acid	HMDB00008	11266	1148	C05984	3783
2-Hydroxyglutaric acid	HMDB02307	439340	15513	C00894	446
2-Hydroxyvaleric acid	HMDB01863	98009	60647	NA	NA
4-Deoxyerythronic acid	HMDB00498	13120901	NA	NA	5484
3-Aminoisobutanoic acid	HMDB03911	64956	27389	C05145	5472
3-Hydroxybutyric acid	HMDB00357	441	20067	C01089	125
3,6-anhydro-D-galactose	NA	16069996	NA	C06474	NA
4-Hydroxybutyric acid	HMDB00710	10413	30830	C00989	5678
cis-Aconitic acid	HMDB29377	638024	28821	C03882	NA
Adipic acid	HMDB00448	196	30832	C06104	115
Alanine	METPA0179	NA	NA	C01401	NA
Allantoic acid	HMDB01209	203	30837	C00499	343
Aminomalonic acid	HMDB01147	100714	17475	C00872	NA
Arachidic acid	HMDB02212	10467	28822	C06425	401
Arachidonic acid	HMDB01043	444899	15843	C00219	193
L-Asparagine	HMDB00168	6267	17196	C00152	14
L-Aspartic acid	HMDB00191	C00049	5960	17053	5206
Azelaic acid	HMDB00784	2266	48131	C08261	5750
Behenic acid	HMDB00944	8215	28941	C08281	260
Benzoic acid	HMDB01870	243	30746	C00180	1297
Beta-Alanine	HMDB00056	239	16958	C00099	5119
Biuret	METPA0837	NA	NA	C06555	NA
Capric acid	HMDB00511	2969	30813	C01571	336
Cholesterol	HMDB00067	11025495	1307929	C00187	163
Citramalic acid	HMDB00426	1081	15584	C00815	5415
Citric acid	HMDB00094	311	30769	C00158	124
Citrulline	HMDB00904	9750	16349	C00327	16
conduritol-beta-epoxide	NA	9989541	NA	NA	NA
Creatinine	HMDB00562	588	16737	C00791	8
L-Cysteine	HMDB00574	5862	17561	C00097	5556
L-Cystine	HMDB00192	67678	16283	C00491	5207
Docosahexaenoic acid	HMDB02183	445580	28125	C06429	3457
Dodecanol	HMDB11626	8193	28878	C02277	NA
Phosphoenolpyruvic acid	HMDB00263	1005	44897	C00074	5264
epsilon-Caprolactam	METPA0843	NA	NA	C06593	NA
Erythritol	HMDB02994	222285	17113	C00503	140
D-Fructose	HMDB00660	439709	28645	C02336	135
L-Fucose	HMDB00174	17106	2181	C01019	268
Fumaric acid	HMDB00134	444972	18012	C00122	3242
Gluconic acid	HMDB00625	10690	33198	C00257	345
D-Glucose	HMDB00122	5793	4167	C00031	133
L-Glutamic acid	HMDB00148	C00025	33032	16015	5174
L-Glutamine	HMDB00641	5961	18050	C00064	5614
Glu-Val	HMDB59717	-	6992567	68846	-
Glutaric acid	HMDB00661	743	17859	C00489	3254
Glyceric acid	HMDB00139	439194	32398	C00258	280
Glycerol	HMDB00131	753	17522	C00116	105
glycerol-3-galactoside	NA	NA	NA	NA	NA
Glycerol 3-phosphate	HMDB35909	435280	NA	NA	NA
Glycine	HMDB00123	750	15428	C00037	20
Glycolic acid	HMDB00115	757	17497	C00160	3219
Glycylproline	HMDB11535	79075	NA	NA	NA
Heptadecanoic acid	HMDB02259	10465	32365	NA	6578
Galactitol	HMDB00107	11850	16813	C01697	5148
Gluconic acid	HMDB00625	10690	33198	C00257	345
L-Histidine	HMDB00177	6274	15971	C00135	21
Hydroxylamine	HMDB03338	787	15429	C00192	6894
hydroxyproline dipeptide	NA	NA	NA	NA	NA
Hypoxanthine	HMDB00157	790	17368	C00262	83
Indoleacetic acid	HMDB00197	802	16411	C00954	5211
Indolelactic acid	HMDB00671	92904	24813	C02043	5641
Indoxyl sulfate	HMDB00682	10258	43355	NA	524
Isocitric acid	HMDB00193	1198	30887	C00311	3328
isoheptadecanoic acid	NA	NA	NA	NA	NA
isohexonic acid	NA	NA	NA	NA	NA
(+/-)-erythro-Isoleucine	HMDB33923	791	38264	C16434	NA
isothreonic acid	NA	NA	NA	NA	NA
ketohexose	NA	NA	NA	NA	NA
L-Lactic acid	HMDB00190	107689	422	C00186	5205
Dodecanoic acid	HMDB00638	3893	30805	C02679	5611
L-Leucine	HMDB00687	6106	15603	C00123	24
Levoglucosan	HMDB00640	2724705	30997	NA	5613
Linoleic acid	HMDB00673	5280450	17351	C01595	191
L-Lysine	HMDB00182	5962	18019	C00047	5200
D-Arabitol	HMDB00568	827	893310	C01904	5551
maleimide	NA	10935	NA	C07272	NA
Malic acid	HMDB00744	525	6650	C00711	118
D-Maltose	HMDB00163	10991489	47937	C00208	413
Mannitol	HMDB00765	6251	16899	C00392	142
D-Mannose	HMDB00169	18950	4208	C00159	NA
Methanolphosphate	NA	13130	NA	NA	NA
L-Methionine	HMDB00696	6137	16643	C00073	5664
Methionine sulfoxide	HMDB02005	847	49033	NA	6428
Citraconic acid	HMDB00634	643798	17626	C02226	5607
Myoinositol	HMDB00211	NA	17268	C00137	5221
Myristic acid	HMDB00806	11005	28875	C06424	196
N-Acetylglutamic acid	HMDB01138	185	12575	C00624	6031
Acetylglycine	HMDB00532	10972	40410	NA	5517
N-Acetylmannosamine	HMDB01129	11096158	63154	C00645	6024
N-methylalanine	NA	5288725	NA	C02721	NA
Naproxen	HMDB01923	156391	7476	C01517	1461
Oleamide	HMDB02117	5283387	116314	C19670	NA
Oleic acid	HMDB00207	445639	16196	C00712	190
Ornithine	HMDB00214	6262	15729	C00077	27
Oxalic acid	HMDB02329	971	16995	C00209	113
Pyroglutamic acid	HMDB00267	7405	18183	C01879	3251
Palmitic acid	HMDB00220	985	15756	C00249	187
Palmitoleic acid	HMDB03229	445638	28716	C08362	188
Pelargonic acid	HMDB00847	8158	29019	C01601	5810
L-Phenylalanine	HMDB00159	6140	17295	C00079	28
Phenylethylamine	HMDB12275	1001	18397	C05332	NA
Phosphate	HMDB01429	1061	18367	C00009	3231
Pipecolic acid	HMDB00070	849	17964	C00408	50
L-Proline	HMDB00162	145742	17203	C00148	29
Pseudouridine	HMDB06036	15020	529213	D04947	NA
Pyrrole-2-carboxylic acid	HMDB04230	12473	36751	C05942	3787
Quinic acid	HMDB03072	NA	17521	C06746	3329
Ribitol	HMDB00508	NA	15963	C00474	316
Ribonic acid	HMDB00867	5460677	21077	C01685	3290
D-Ribose	HMDB00283	5779	16988	C00121	313
Salicylic acid	HMDB01895	338	16914	C00805	616
L-Serine	HMDB00187	5951	17115	C00065	5203
Sorbitol	HMDB00247	5780	17924	C00794	143
Stearic acid	HMDB00827	5281	28842	C01530	189
Succinic acid	HMDB00254	1110	15741	C00042	114
Sucrose	HMDB00258	5988	17992	C00089	137
D-Tagatose	HMDB03418	92092	47693	C00795	NA
Tartaric acid	HMDB00956	444305	15671	C00898	4197
Taurine	HMDB00251	1123	15891	C00245	31
D-Threitol	HMDB04136	169019	48300	C16884	NA
Threonic acid	HMDB00943	151152	49059	C01620	5891
L-Threonine	HMDB00167	6288	16857	C00188	32
Retinal	HMDB01358	638015	17898	C00376	6188
gamma-Tocopherol	METPA0297	NA	NA	C02483	NA
4-Hydroxyproline	HMDB00725	5810	18095	C01157	257
Trehalose	HMDB00975	7427	16551	C01083	5913
L-Tryptophan	HMDB00929	6305	16828	C00078	5879
L-Tyrosine	HMDB00158	6057	17895	C00082	34
Uridine diphosphate glucuronic acid	HMDB00935	17473	17200	C00167	5884
Urea	HMDB00294	1176	16199	C00086	6
Uric acid	HMDB00289	1175	17775	C00366	88
Uridine	HMDB00296	6029	16704	C00299	90
L-Valine	HMDB00883	6287	16414	C00183	5842
D-Xylitol	HMDB02917	6912	1305691	C00379	NA
D-Xylose	HMDB00098	135191	53455	C00181	314
